# Supplementary material
Source: PubMed Central journal article supplement (PMC6803062)
Supplement: NIHMS1050282-supplement-Supp.pdf [file NIHMS1050282-supplement-Supp.pdf]

## Supplementary Material

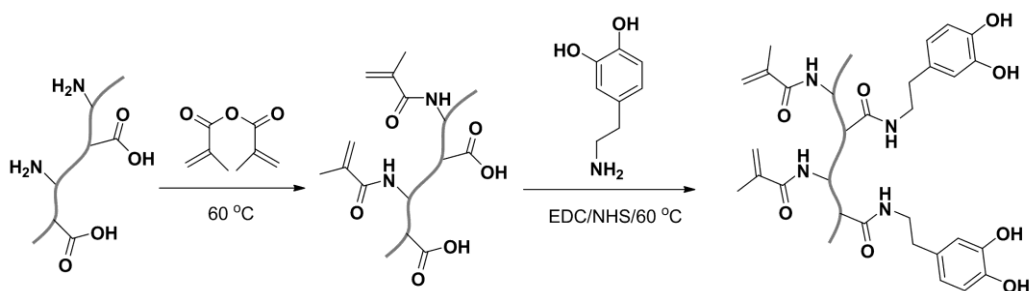

**Supplementary Figure 1.** Synthesis route of GelMA/C bioink.

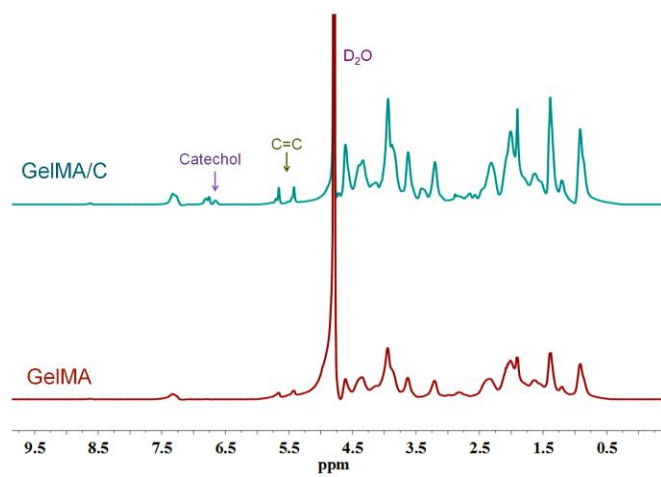

**Supplementary Figure 2.** <sup>1</sup>H NMR spectra of GelMA and GelMA/C copolymers.

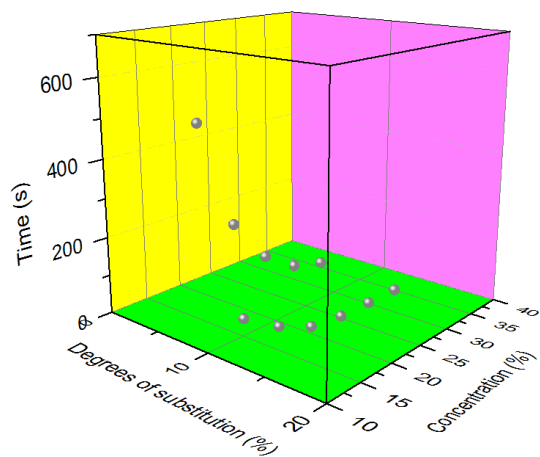

| Degrees of Substitution (%) | Bioink Concentration (wt%) |        |        |        |       |       |
|-----------------------------|----------------------------|--------|--------|--------|-------|-------|
|                             | 10                         | 15     | 20     | 25     | 30    | 35    |
| 6                           | --                         | ~500 s | ~220 s | ~100 s | ~40 s | ~15 s |
| 13.3                        | ~120 s                     | ~60 s  | ~18 s  | ~5 s   | ~2 s  | ~1 s  |

**Supplementary Figure 3.** The gelation time of GelMA/C solutions by varying DS of catechol and solution concentration.

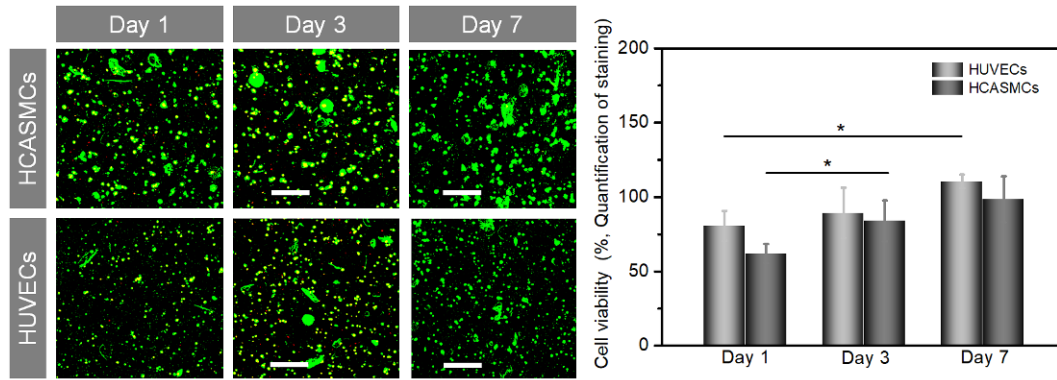

**Supplementary Figure 4.** Viability assay of HUVECs and HCASMCs in the vasculature using Live-Dead staining after 1, 3, and 7 days of culture. The results were normalized to the whole fluorescence area on day 1. The scale bars indicate 100  $\mu\text{m}$ . Data are the mean  $\pm$  sd.,  $n \geq 9$ ,  $*P < 0.05$ .

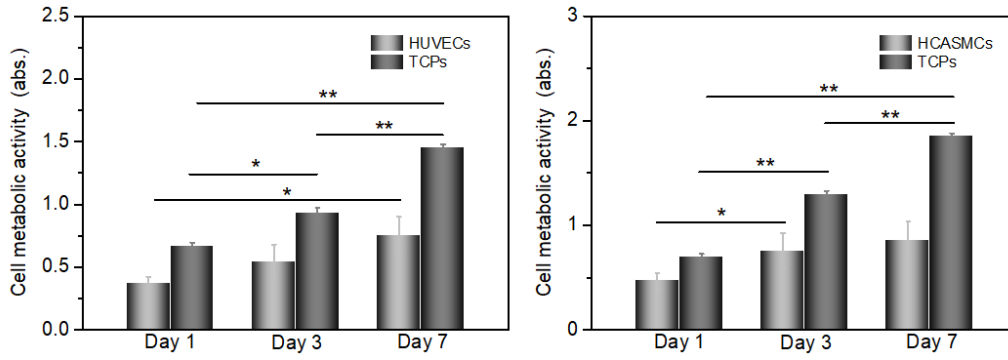

**Supplementary Figure 5.** Metabolic activity of HUVECs and HCASMCs in the vasculature and on the TCPs using CCK-8 kit after 1, 3, and 7 days of culture; the mean  $\pm$  sd.,  $n \geq 9$ , \* $P < 0.05$ , \*\* $P < 0.01$

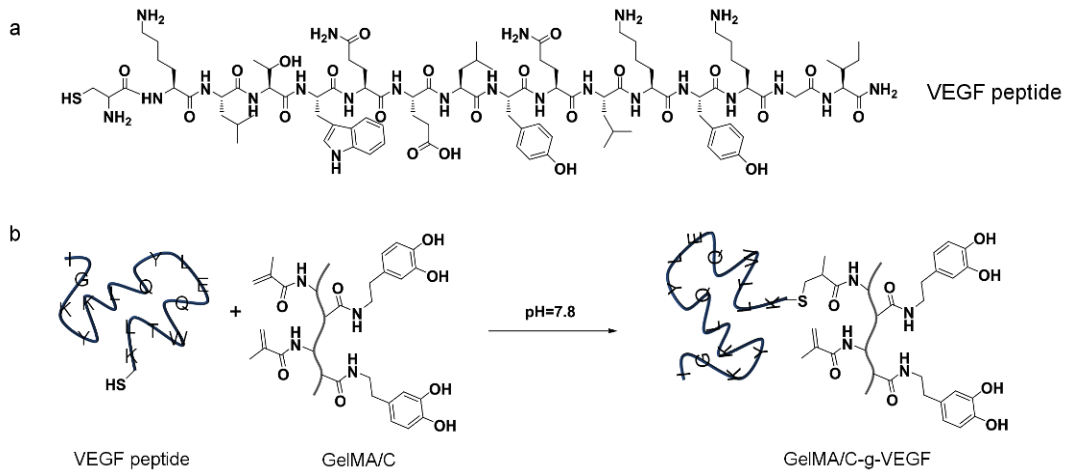

**Supplementary Figure 6.** Structural schematics of VEGF peptide and its immobilization onto GelMA/C copolymers.

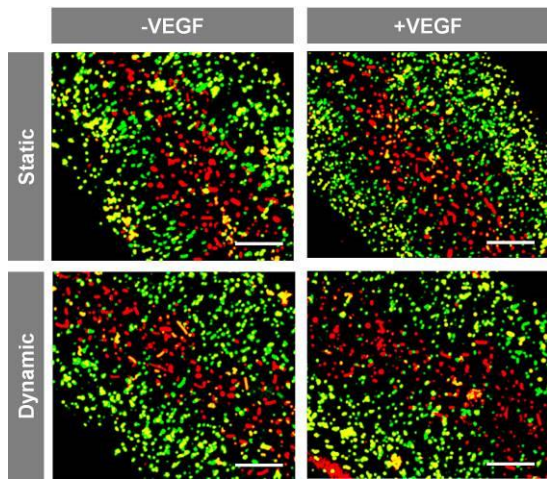

**Supplementary Figure 7.** Immunofluorescence images of 3D bioprinted vasculature (CD31, red;  $\alpha$ -SMA, green) including -VEGF/static group, -VEGF/dynamic group +VEGF/static group, +VEGF/dynamic group. The scale bars indicate 100  $\mu$ m.

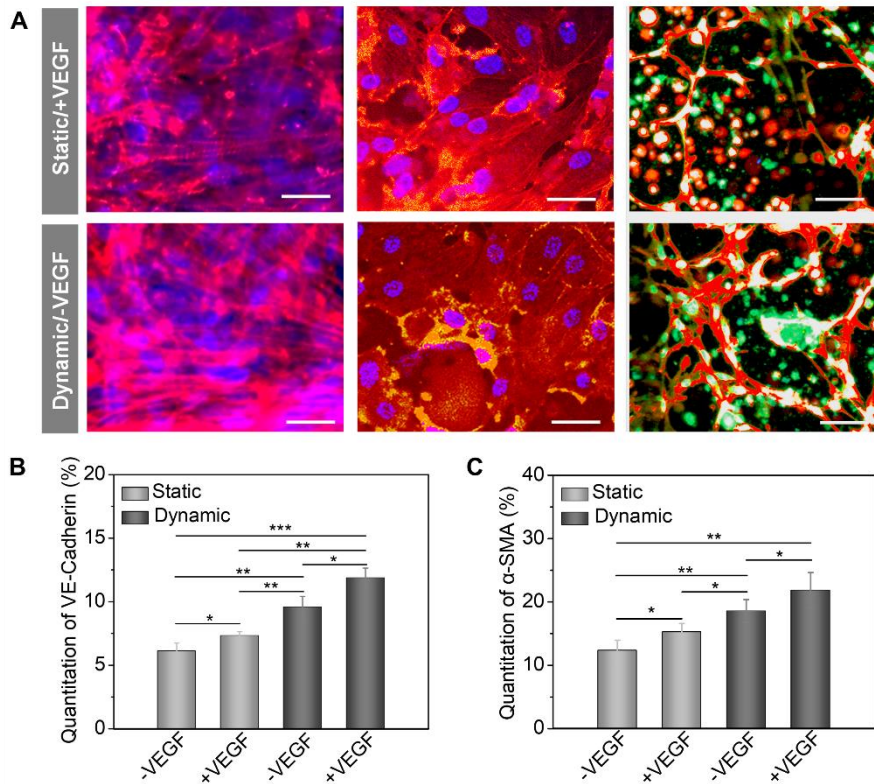

**Supplementary Figure 8.** (A) Immunofluorescence images of the endothelium (spreading and orientation) of 3D bioprinted vasculatures (vinculin, red; DAPI, blue) including +VEGF/static group, -VEGF/dynamic group. The scale bars indicate 20  $\mu$ m. Immunofluorescence images of the endothelium (intercellular junctions) of 3D bioprinted vasculatures (VE-cadherin, green; F-actin, red; DAPI, blue) including +VEGF/static group, -VEGF/dynamic group. The scale bars indicate 20  $\mu$ m. Immunofluorescence images of the smooth muscle of 3D bioprinted vasculatures ( $\alpha$ -SMA, green; F-actin, red; DAPI, blue) including +VEGF/static group, -VEGF/dynamic group. The scale bars indicate 50  $\mu$ m. (B) Quantitative analysis (avg. area % in immunofluorescence images) of VE-Cadherin expression in the endothelial layer of 3D bioprinted vasculature. (C). Quantitative analysis (avg. area % in immunofluorescence images) of  $\alpha$ -SMA expression in the smooth muscle layer of 3D bioprinted vasculature.



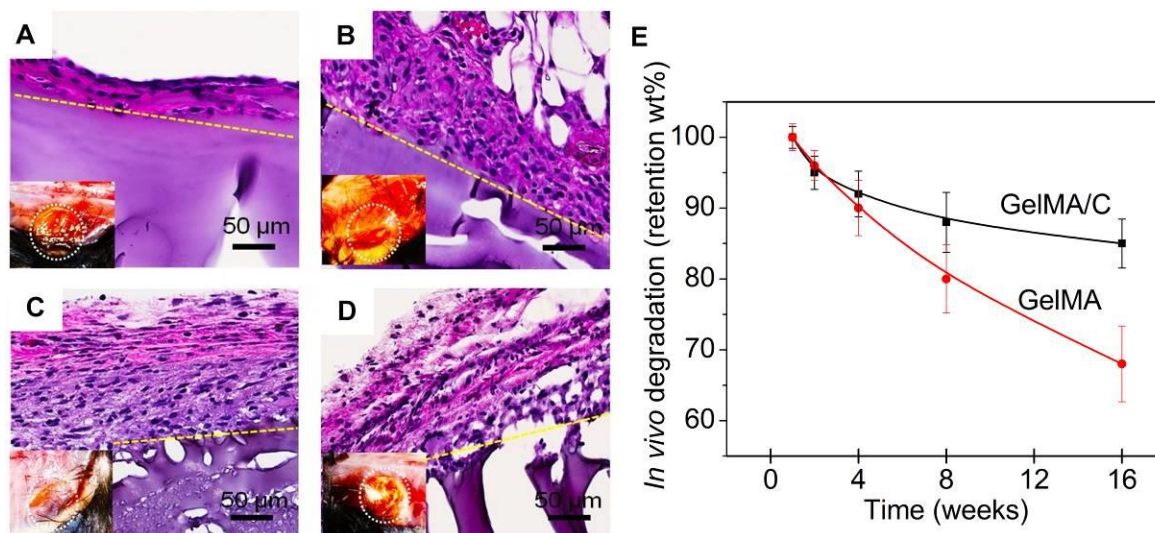

**Supplementary Figure 9.** In vivo biocompatibility and degradation of GelMA/C hydrogels after subcutaneous implantation on the back of C57BL/6N mice. Macroscopic view of implanted hydrogel and H&E stained sections of the implants, harvested at week 1 (A), week 4 (B), week 8 (C) and week 16 (D). E shows the degradation rate of oxidative crosslinked GelMA/C and photo-crosslinked GelMA.

**Supplementary Movie S1.** 3D bioprinting process of vascular constructs using coaxial extrusion bioprinter. Fluorescence dyes were added to improve visualization of GelMA/C ink (Fluorescein) and crosslinking slurry (Nile red).

**Supplementary Movie S2.** Dynamic flow behavior in our 3D bioprinted vasculature, where cells were perfused into the channel.

**Supplementary Movie S3.** 3D bioprinted vasculature perfusion in dynamic culture device (customized bioreactor), including temperature controller, peristaltic pump, medium reservoir, gas exchange valve, and culture chamber.
